# Supplementary material for: The influence of an external magnetic field and magnetic-site dilution on the magnetization dynamics of a coordination network based on ferromagnetic coupled dinuclear dysprosium(iii) units
Source: Royal Society of Chemistry journal article supplement (doi:10.1039/c7qi00663b), 2017-12-06
Supplement: c7qi00663b1.pdf [file c7qi00663b1.pdf]

Supporting Information for

**Influence of the external magnetic field and magnetic-site dilution on the magnetization dynamics of a coordination network based on ferromagnetic coupled dinuclear dysprosium(III) units**

Xuejing Zhang, Na Xu,\* Wei Shi, Bing-Wu Wang, and Peng Cheng\*

**Table of Contents**

|                                                                          |           |
|--------------------------------------------------------------------------|-----------|
| <b>1. Structure and Crystallographic Studies .....</b>                   | <b>2</b>  |
| <b>2. Powder X-ray Diffraction (PXRD) and Thermal analyses(TG) .....</b> | <b>5</b>  |
| <b>3. Other Magnetic Data .....</b>                                      | <b>6</b>  |
| <b>4. Tables of Magnetic Data.....</b>                                   | <b>15</b> |

## 1. Structure and Crystallographic Studies

**Table S1** Selected crystallographic parameters, bond lengths and angles of **Dy**

| <b>Dy</b>                                                                           |                                                                                 |
|-------------------------------------------------------------------------------------|---------------------------------------------------------------------------------|
| Formula                                                                             | C <sub>20</sub> H <sub>22</sub> Dy <sub>2</sub> N <sub>12</sub> O <sub>12</sub> |
| Fw                                                                                  | 947.50                                                                          |
| Temp, K                                                                             | 120(2)                                                                          |
| Crystal syst                                                                        | Monoclinic                                                                      |
| Space group                                                                         | <i>P2<sub>1</sub>/c</i>                                                         |
| <i>a</i> , Å                                                                        | 9.72904(17)                                                                     |
| <i>b</i> , Å                                                                        | 11.3592(2)                                                                      |
| <i>c</i> , Å                                                                        | 24.6724(4)                                                                      |
| $\alpha$ , deg                                                                      | 90                                                                              |
| $\beta$ , deg                                                                       | 93.8572(17)                                                                     |
| $\gamma$ , deg                                                                      | 90                                                                              |
| <i>V</i> , Å <sup>3</sup>                                                           | 2720.47(8)                                                                      |
| <i>Z</i>                                                                            | 4                                                                               |
| <i>D<sub>c</sub></i> , g/cm <sup>3</sup>                                            | 2.3131                                                                          |
| $\mu$ (mm <sup>-1</sup> )                                                           | 5.539                                                                           |
| Data/ parameter                                                                     | 4785 / 419                                                                      |
| obs rflns                                                                           | 10756                                                                           |
| $\theta$ range, (°)                                                                 | 5.84 - 50                                                                       |
| <i>R</i> <sub>int</sub> /GOF on <i>F</i> <sup>2</sup>                               | 0.0279 / 1.059                                                                  |
| <i>R</i> <sub>1</sub> , <i>wR</i> <sub>2</sub> [ <i>I</i> >2 $\sigma$ ( <i>I</i> )] | 0.0258, 0.0557                                                                  |
| <i>R</i> <sub>1</sub> , <i>wR</i> <sub>2</sub> (all data)                           | 0.0317, 0.0590                                                                  |
| max/min, e Å <sup>-3</sup>                                                          | 0.60/-0.73                                                                      |

| <b>Dy</b>         |            |                   |            |
|-------------------|------------|-------------------|------------|
| Bonds/Angles      | (Å / °)    | Bonds/Angles      | (Å / °)    |
| Dy(1)-O(3)        | 2.232(3)   | N(16)-Dy(1)-N(36) | 148.58(11) |
| Dy(1)-O(14)       | 2.294(3)   | O(42)-Dy(1)-Dy(2) | 172.12(8)  |
| Dy(1)-O(22)       | 2.384(3)   | O(42)-Dy(1)-O(22) | 70.82(10)  |
| Dy(1)-O(42)       | 2.367(3)   | O(42)-Dy(1)-N(16) | 100.55(11) |
| Dy(1)-O(46)       | 2.387(3)   | O(42)-Dy(1)-O(46) | 76.22(11)  |
| Dy(1)-O(32)       | 2.378(3)   | O(42)-Dy(1)-O(32) | 85.69(11)  |
| Dy(1)-N(16)       | 2.578(4)   | O(42)-Dy(1)-N(36) | 62.45(11)  |
| Dy(1)-N(36)       | 2.639(4)   | O(46)-Dy(1)-Dy(2) | 104.92(8)  |
| Dy(2)-O(3)        | 2.308(3)   | O(46)-Dy(1)-N(16) | 71.26(11)  |
| Dy(2)-O(11)       | 2.373(3)   | O(46)-Dy(1)-N(36) | 78.84(11)  |
| Dy(2)-O(14)       | 2.221(3)   | O(32)-Dy(1)-Dy(2) | 90.03(8)   |
| Dy(2)-O(33)       | 2.369(3)   | O(32)-Dy(1)-N(16) | 135.87(11) |
| Dy(2)-O(43)       | 2.397(3)   | O(32)-Dy(1)-O(46) | 150.54(10) |
| Dy(2)-O(45)       | 2.400(3)   | O(32)-Dy(1)-N(36) | 72.26(11)  |
| Dy(2)-N(26)       | 2.611(4)   | N(36)-Dy(1)-Dy(2) | 109.92(8)  |
| Dy(2)-N(5)        | 2.619(4)   | O(3)-Dy(2)-Dy(1)  | 34.78(7)   |
| O(3)-Dy(1)-Dy(2)  | 36.15(7)   | O(3)-Dy(2)-O(11)  | 80.53(10)  |
| O(3)-Dy(1)-O(14)  | 70.52(10)  | O(3)-Dy(2)-O(33)  | 151.43(10) |
| O(3)-Dy(1)-O(22)  | 150.74(10) | O(3)-Dy(2)-N(5)   | 72.67(11)  |
| O(3)-Dy(1)-N(16)  | 103.08(11) | O(3)-Dy(2)-O(45)  | 123.47(11) |
| O(3)-Dy(1)-O(42)  | 138.42(10) | O(3)-Dy(2)-N(26)  | 134.98(11) |
| O(3)-Dy(1)-O(46)  | 79.66(11)  | O(33)-Dy(2)-Dy(1) | 170.88(7)  |
| O(3)-Dy(1)-O(32)  | 100.04(11) | O(33)-Dy(2)-O(11) | 71.76(10)  |
| O(3)-Dy(1)-N(36)  | 80.02(11)  | O(33)-Dy(2)-O(43) | 84.37(11)  |
| O(14)-Dy(1)-Dy(2) | 34.37(7)   | O(33)-Dy(2)-N(5)  | 100.30(11) |
| O(14)-Dy(1)-O(22) | 80.37(10)  | O(33)-Dy(2)-O(45) | 77.45(11)  |
| O(14)-Dy(1)-N(16) | 72.39(11)  | O(33)-Dy(2)-N(26) | 62.70(10)  |
| O(14)-Dy(1)-O(42) | 150.22(10) | O(43)-Dy(2)-Dy(1) | 91.40(7)   |
| O(14)-Dy(1)-O(46) | 125.34(11) | O(43)-Dy(2)-N(5)  | 137.28(10) |
| O(14)-Dy(1)-O(32) | 80.82(10)  | O(43)-Dy(2)-O(45) | 149.14(10) |
| O(14)-Dy(1)-N(36) | 135.57(11) | O(43)-Dy(2)-N(26) | 70.80(10)  |
| O(22)-Dy(1)-N(16) | 64.07(11)  | N(5)-Dy(2)-Dy(1)  | 88.29(8)   |
| O(22)-Dy(1)-O(46) | 116.72(11) | O(45)-Dy(2)-Dy(1) | 102.75(8)  |
| O(22)-Dy(1)-N(36) | 125.24(10) | O(45)-Dy(2)-N(5)  | 71.29(11)  |
| N(16)-Dy(1)-Dy(2) | 87.13(8)   | O(45)-Dy(2)-N(26) | 78.70(11)  |

**Table S2** Selected examples of high-dimensional **Dy-MOFs** behaving as SMMs.

| Structural formal                                                                                                                            | Structure dimensionality | DC field(Oe) | $U_{\text{eff}}(\text{K})$ | Hysteresis loop/Coercive field(Oe)                                                               | Magnetic interaction | Ref       |
|----------------------------------------------------------------------------------------------------------------------------------------------|--------------------------|--------------|----------------------------|--------------------------------------------------------------------------------------------------|----------------------|-----------|
| $[\text{Dy}(\text{3-py-4-pmc})(\text{C}_2\text{O}_4)_{0.5}(\text{OH})(\text{H}_2\text{O})]$                                                  | 2                        | 0            | 186                        | 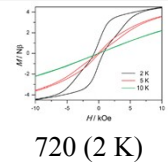<br>720 (2 K) | ferromagnetic        | 33        |
| $[\text{Ln}(\text{phen})-(\text{L})]_n$                                                                                                      | 3                        | 0            | 131                        |               | ferromagnetic        | 32        |
| $\text{Dy}_2(\text{INO})_4(\text{NO}_3)_2 \cdot 2\text{CH}_3\text{CN}$                                                                       | 3                        | 0            | 110                        |                                                                                                  | ferromagnetic        | 34        |
| $[\text{Dy}_2(\text{hmi})_2(\text{NO}_3)_2(\text{MeOH})_2]_n \cdot \text{MeCN}$                                                              | 2                        | 700          | 71                         |                                                                                                  | ferromagnetic        | 29        |
| $[\text{Dy}_2(\text{apca})_4(\mu_2\text{-OH})_2(\text{H}_2\text{O})_2]_n$                                                                    | 2                        | 0            | 59                         | <br>740 (2 K) | ferromagnetic        | This work |
| $\{[\text{Dy}_2(\text{FDA})_3(\text{DMF})_2] \cdot 1.5\text{DMF}\}_n$<br>$[\text{Dy}_2(\text{FDA})_3(\text{DMF})_2(\text{CH}_3\text{OH})]_n$ | 3                        | 2000         | 41.8/67.5                  |                                                                                                  | ferromagnetic        | 37        |
| $\text{Dy}(\text{C}_2\text{O}_4)_{1.5}(\text{phen}) \cdot 0.5\text{H}_2\text{O}$                                                             | 3                        | 1200         | 35.5/32.6                  |                                                                                                  | ferromagnetic        | 36        |

3-py-4-pmc: 2-(3-pyridyl)pyrimidine-4-carboxylate; L: 5-hydroxyisophthalic acid; phen: 1, 10-phenanthroline; HINO = isonicotinic acid N-oxide; Hapca : 3-aminopyrazine-2-carboxylic acid; hmi: (isonicotino)hydrazine; H<sub>2</sub>FDA = furan-2,5-dicarboxylic acid

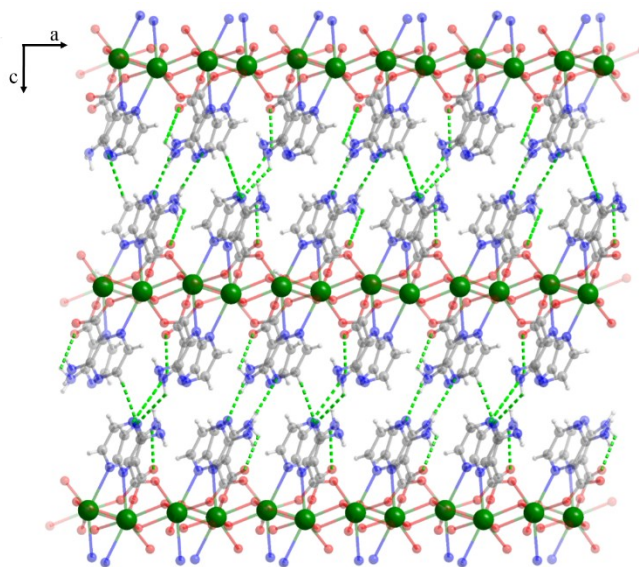

**Figure S1** The supramolecular network of **Dy** connected by hydrogen bonds.

## 2. Powder X-ray Diffraction (PXRD) and Thermal analyses(TG)

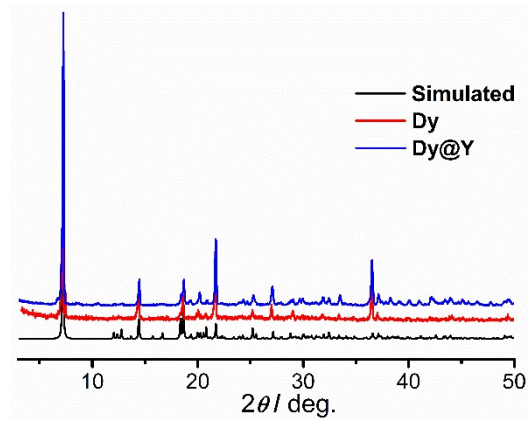

Figure S2 Simulated and measured PXRD of Dy and Dy@Y.

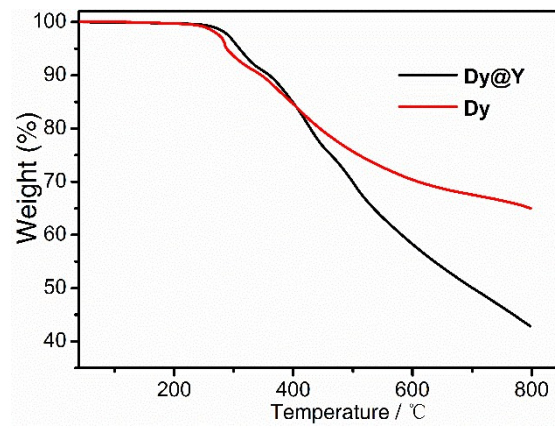

Figure S3 TGA of Dy and Dy@Y.

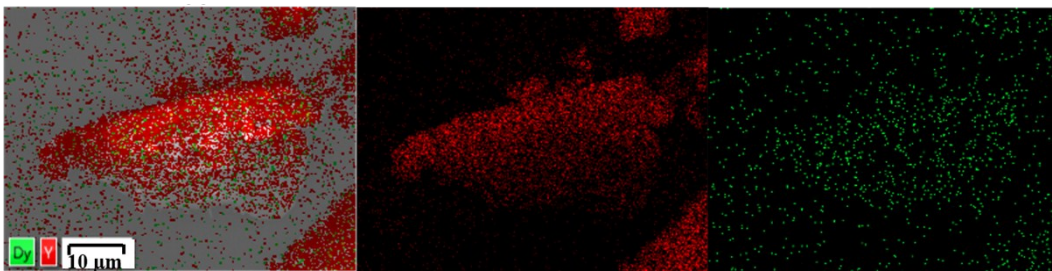

Figure S4 SEM image of Dy@Y.

### 3. Other Magnetic Data

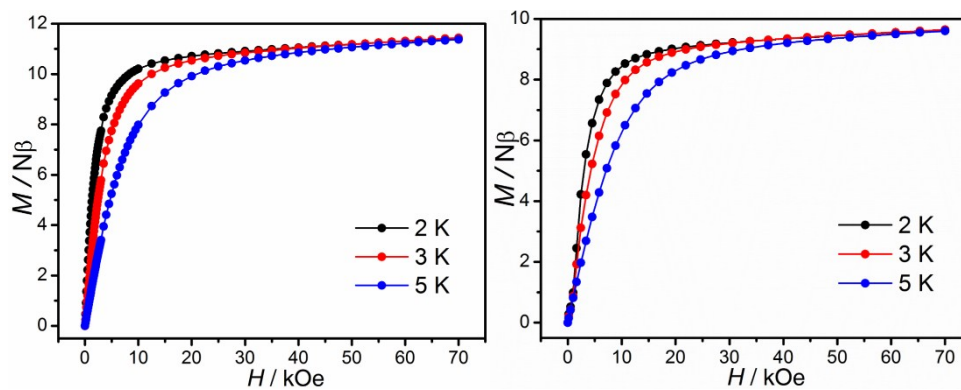

Figure S5 variable-field magnetizations of Dy (left) and Dy@Y (right).

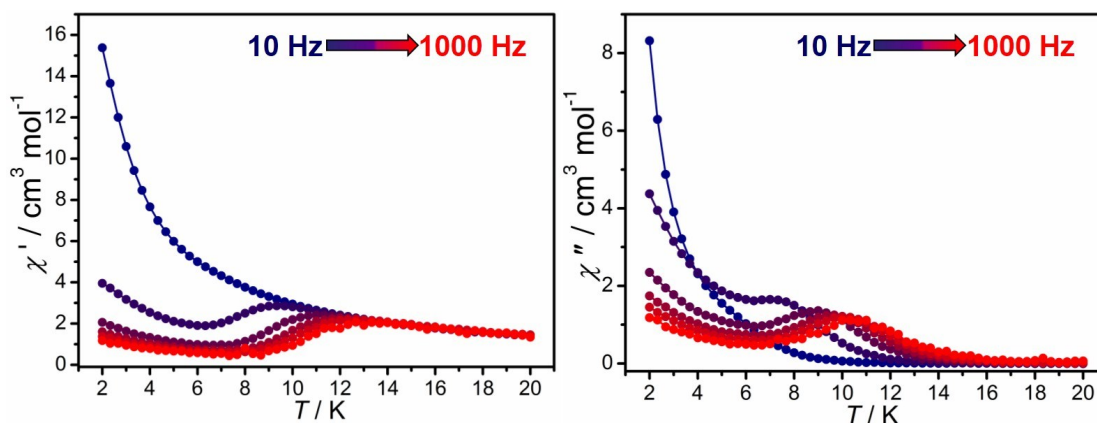

Figure S6 Temperature dependence of the ac susceptibilities of Dy under zero dc field.

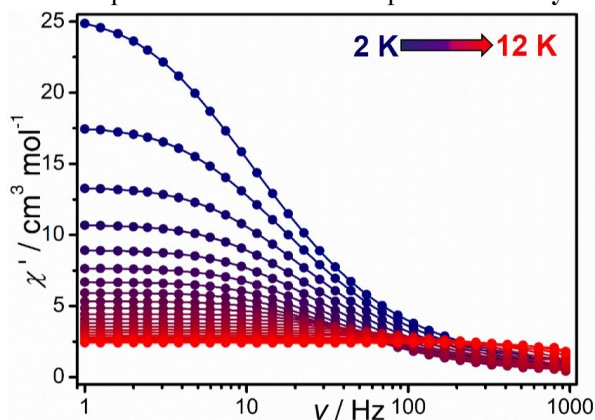

Figure S7 Frequency dependence of the in-phase ( $\chi'$ ) ac susceptibility of Dy under zero dc field.

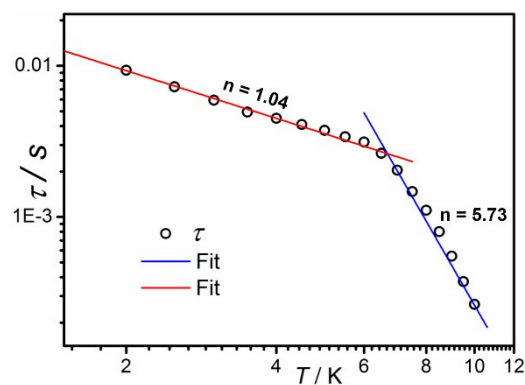

**Figure S8** Plots of  $\ln\tau$  versus  $\ln T$  for **Dy** under zero dc field. The solid lines are linear fitting results.

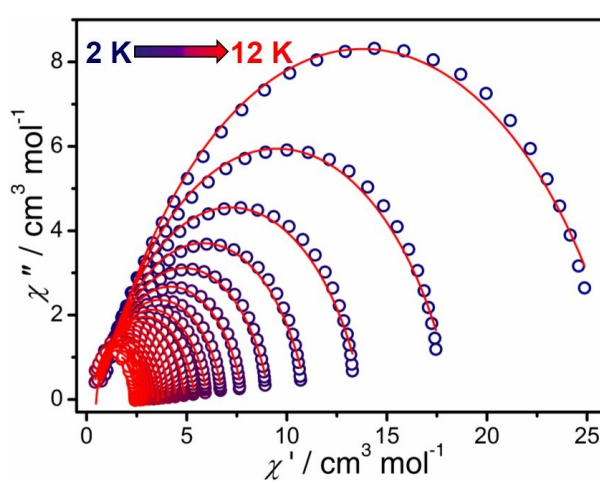

**Figure S9** Cole-Cole diagram for **Dy** under zero dc field fitted by the general Debye model.

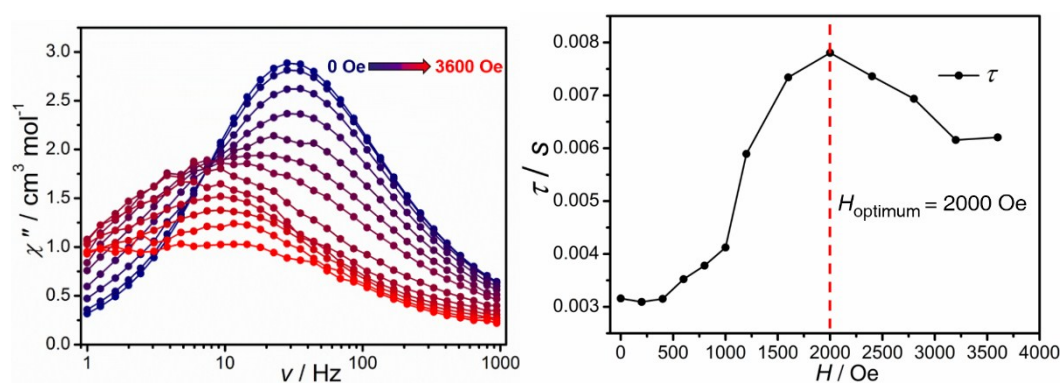

**Figure S10** a) Frequency dependence of the out-of-phase ( $\chi''$ ) ac susceptibility for **Dy** measured at 4 K with different dc fields. b) Field dependence of the relaxation time from  $\chi''$  vs.  $\nu$  data.



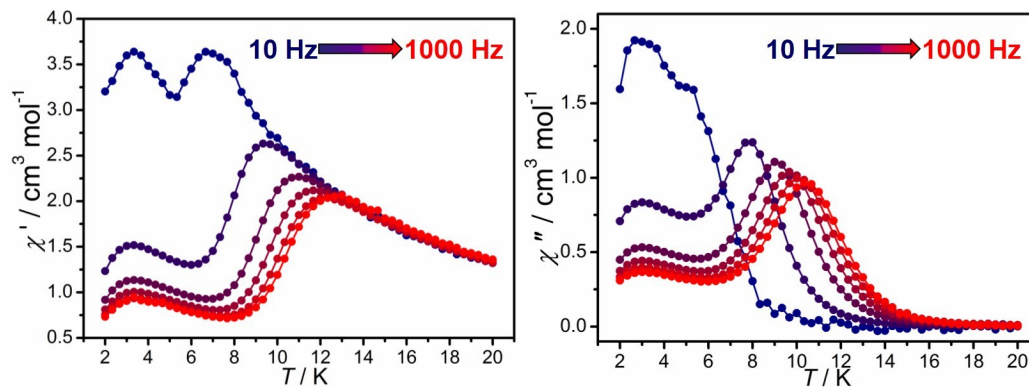

**Figure S11** Temperature dependence of the in-phase ( $\chi'$ ) and out-of phase ( $\chi''$ ) ac susceptibilities of **Dy** under 2000 Oe dc field.

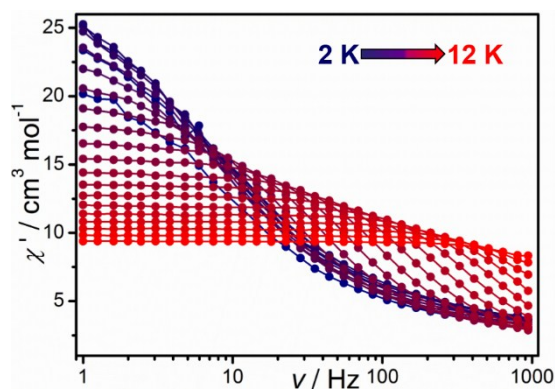

**Figure S12** Frequency dependence of the in-phase ( $\chi'$ ) ac susceptibility components of **Dy** under 2000 Oe dc field.

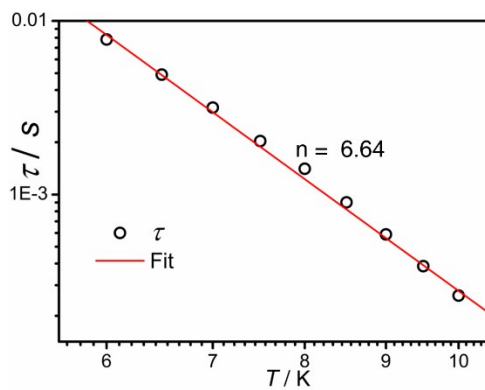

**Figure S13** Plot of  $\ln\tau$  versus  $\ln T$  for **Dy** under 2000 Oe dc field. The solid line is linear fitting result.

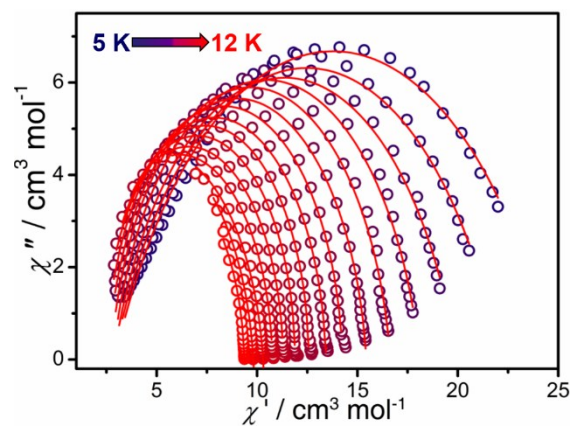

**Figure S14** Cole-Cole diagram for **Dy** under 2000 Oe dc field extracted by plotting  $\chi''$  vs  $\chi'$  and fitted by the general Debye model.

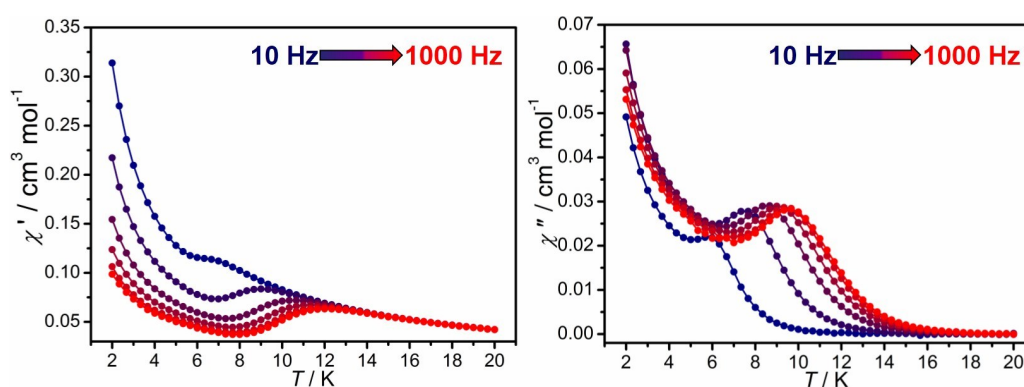

**Figure S15** Temperature dependence of the in-phase ( $\chi'$ ) and out-of phase ( $\chi''$ ) ac susceptibilities of **Dy@Y** under zero dc field.

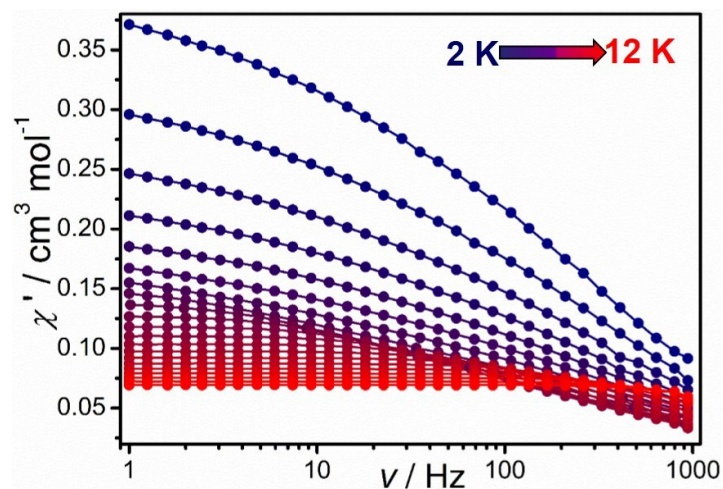

**Figure S16** Frequency dependence of the in-phase ( $\chi'$ ) ac susceptibility of **Dy@Y** under zero dc field.

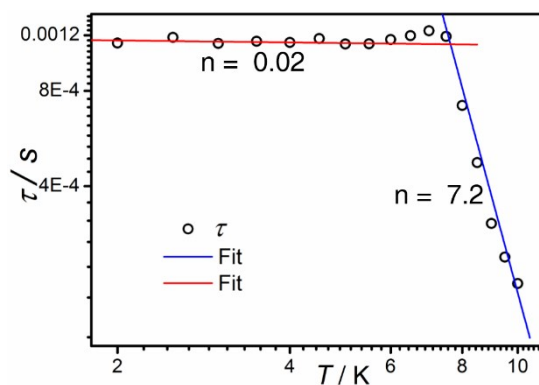

**Figure S17** Plot of  $\ln\tau$  versus  $\ln T$  for **Dy@Y** under zero dc field. The solid line is linear fitting result.

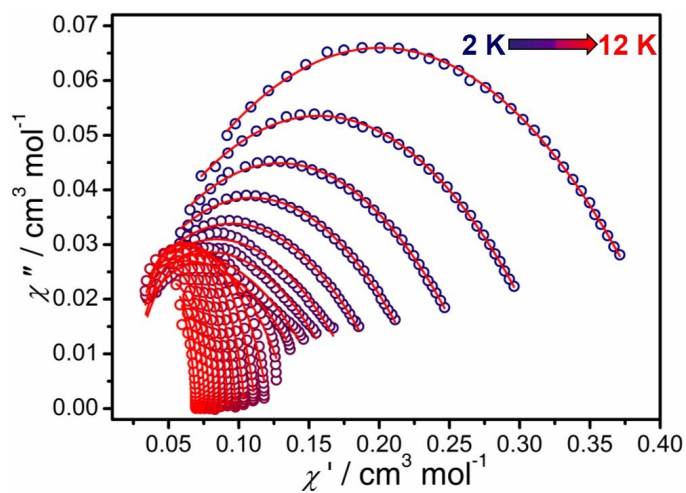

**Figure S18** Cole-Cole diagram for **Dy@Y** under zero dc field fitted by the general Debye model.

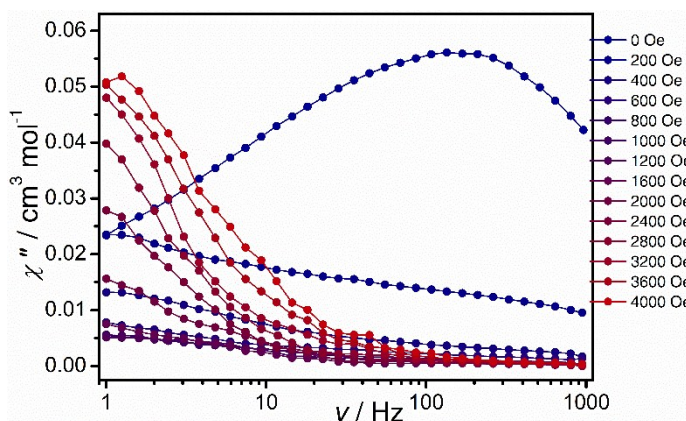

**Figure S19** Frequency dependence of the out-of-phase ( $\chi''$ ) ac susceptibility components for **Dy@Y** measured at 2 K with different dc fields.

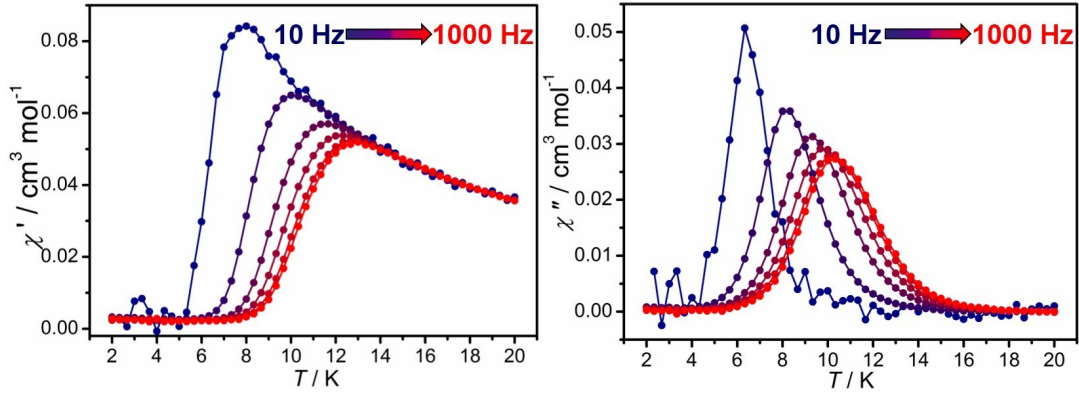

**Figure S20** Temperature dependence of the in-phase ( $\chi'$ ) and out-of phase ( $\chi''$ ) ac susceptibilities of **Dy@Y** under 1000 Oe dc field.

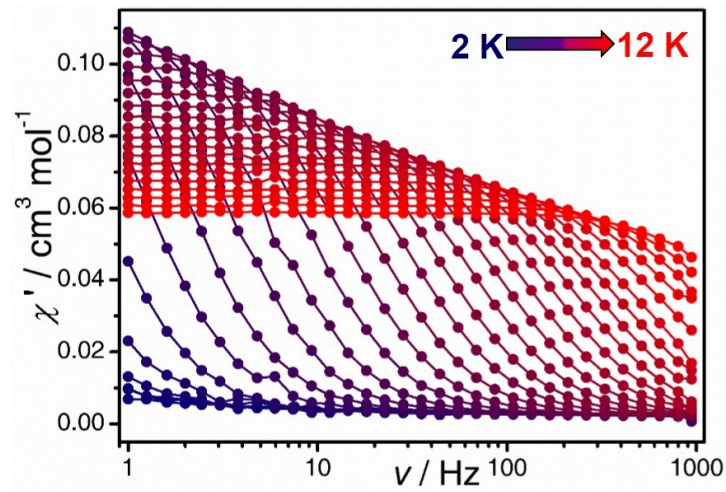

**Figure S21** Frequency dependence of the in-phase ( $\chi'$ ) ac susceptibility components of **Dy@Y** under 1000 Oe dc field.

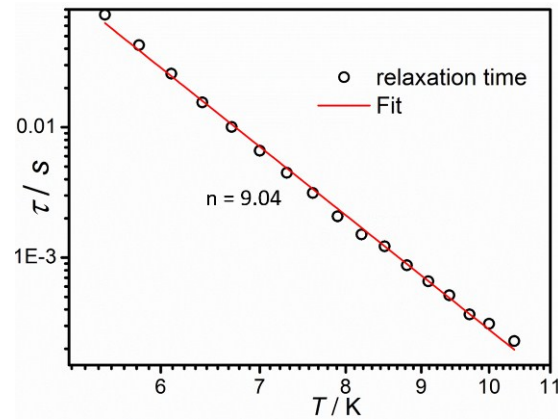

**Figure S22** Plot of  $\ln\tau$  versus  $\ln T$  for **Dy@Y** under 1000 Oe dc field. The solid line is linear fitting result.

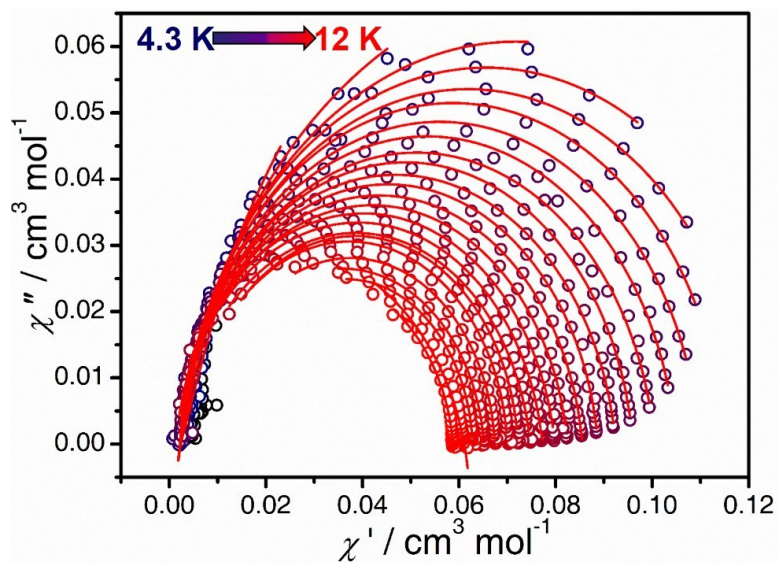

**Figure S23** Cole-Cole diagram for **Dy@Y** under 1000 Oe dc field extracted by plotting  $\chi''$  vs  $\chi'$  and fitted by the general Debye model.

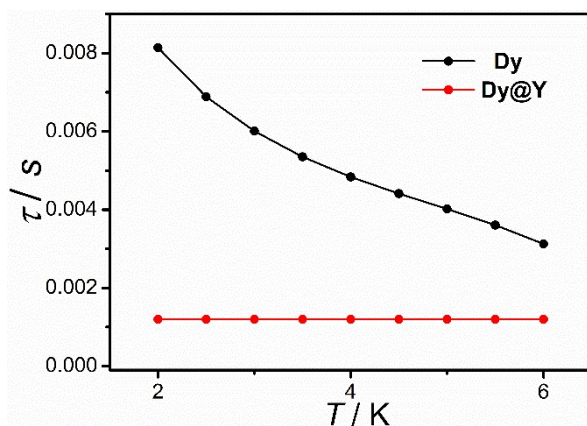

**Figure S24** The relaxation time  $\tau$  versus  $T$  for **Dy** and **Dy@Y** at low temperatures under zero dc field.

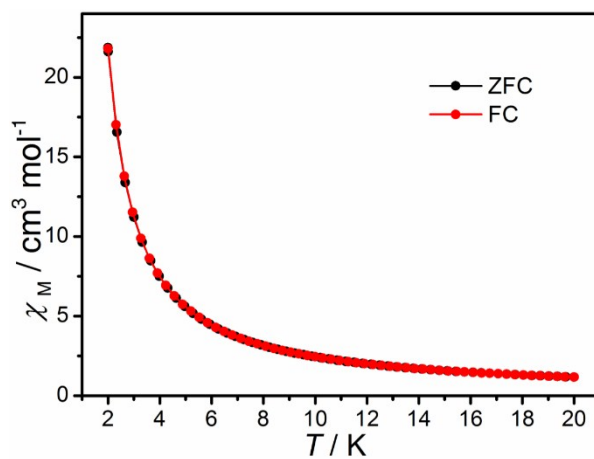

**Figure S25** The ZFCM/FCM plots at 50 Oe of **Dy**.

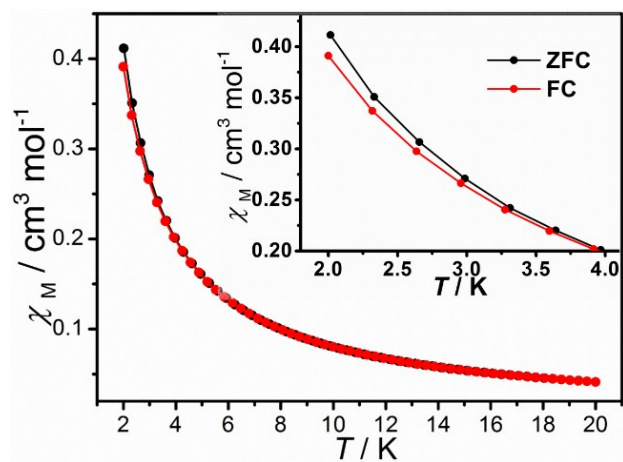

**Figure S26** The ZFCM/FCM plots at 50 Oe of **Dy@Y**.

#### 4. Tables of Magnetic Data

**Table S3.** The parameters of the Cole-Cole plots fitted by the general Debye models of **Dy** under zero dc field.

| <b>Dy</b>    |          |          |          |
|--------------|----------|----------|----------|
| <i>T</i> / K | $\chi_0$ | $\chi_1$ | $\alpha$ |
| 2.0          | 0.662    | 26.909   | 0.281    |
| 2.5          | 0.716    | 18.304   | 0.243    |
| 3.0          | 0.585    | 13.798   | 0.231    |
| 3.5          | 0.629    | 11.006   | 0.210    |
| 4.0          | 0.586    | 9.145    | 0.198    |
| 4.5          | 0.525    | 7.822    | 0.194    |
| 5.0          | 0.492    | 6.821    | 0.184    |
| 5.5          | 0.511    | 6.033    | 0.164    |
| 6.0          | 0.473    | 5.400    | 0.143    |
| 6.5          | 0.481    | 4.887    | 0.112    |
| 7.0          | 0.436    | 4.458    | 0.092    |
| 7.5          | 0.434    | 4.100    | 0.067    |
| 8.0          | 0.300    | 3.808    | 0.079    |
| 8.5          | 0.371    | 3.553    | 0.059    |
| 9.0          | 0.309    | 3.322    | 0.050    |
| 9.5          | 0.292    | 3.123    | 0.044    |
| 10.0         | 0.299    | 2.949    | 0.040    |
| 10.5         | 0.361    | 2.788    | 0.022    |
| 11.0         | 0.295    | 2.649    | 0.027    |
| 11.5         | 0.309    | 3.322    | 0.050    |
| 12.0         | 0        | 2.411    | 0.037    |

**Table S4.** The parameters of the Cole-Cole plots fitted by the general Debye models of **Dy** under 2000 Oe dc field.

| <b>Dy</b>    |          |          |          |
|--------------|----------|----------|----------|
| <i>T</i> / K | $\chi_0$ | $\chi_1$ | $\alpha$ |
| 5            | 2.904    | 24.668   | 0.299    |
| 5.5          | 2.862    | 22.091   | 0.259    |
| 6.0          | 2.836    | 19.936   | 0.210    |
| 6.5          | 2.800    | 18.120   | 0.148    |
| 7.0          | 2.698    | 16.645   | 0.106    |
| 7.5          | 2.566    | 15.442   | 0.082    |
| 8.0          | 2.478    | 14.258   | 0.045    |
| 8.5          | 2.300    | 13.431   | 0.038    |
| 9.0          | 2.293    | 12.574   | 0.009    |
| 9.5          | 2.143    | 11.887   | 0.003    |
| 10.0         | 1.866    | 11.294   | 0.013    |
| 10.5         | 1.514    | 10.758   | 0.025    |
| 11.0         | 0        | 10.297   | 0.089    |
| 11.5         | 0        | 9.810    | 0.083    |
| 12.0         | 0.091    | 9.354    | 0.028    |



**Table S5.** The parameters of the Cole-Cole plots fitted by the general Debye models of **Dy@Y** under zero dc field.

| <b>Dy@Y</b>    |          |          |          |
|----------------|----------|----------|----------|
| $T / \text{K}$ | $\chi_0$ | $\chi_1$ | $\alpha$ |
| 2.0            | 0        | 0.420    | 0.581    |
| 2.5            | 0        | 0.335    | 0.586    |
| 3.0            | 0        | 0.278    | 0.586    |
| 3.5            | 0        | 0.239    | 0.579    |
| 4.0            | 0        | 0.212    | 0.580    |
| 4.5            | 0        | 0.193    | 0.583    |
| 5.0            | 0        | 0.179    | 0.584    |
| 5.5            | 0        | 0.167    | 0.564    |
| 6.0            | 0.002    | 0.158    | 0.547    |
| 6.5            | 0.005    | 0.138    | 0.515    |
| 7.0            | 0.019    | 0.121    | 0.345    |
| 7.5            | 0.021    | 0.111    | 0.259    |
| 8.0            | 0.021    | 0.104    | 0.196    |
| 8.5            | 0.021    | 0.097    | 0.149    |
| 9.0            | 0.020    | 0.092    | 0.115    |
| 9.5            | 0.019    | 0.087    | 0.099    |
| 10.0           | 0.021    | 0.083    | 0.076    |
| 10.5           | 0.021    | 0.079    | 0.063    |
| 11.0           | 0.028    | 0.075    | 0.013    |
| 11.5           | 0.021    | 0.072    | 0.063    |
| 12.0           | 0        | 0.069    | 0.115    |

**Table S6.** The parameters of the Cole-Cole plots fitted by the general Debye models of **Dy@Y** under 1000 Oe dc field.

| <b>Dy@Y</b>  |          |          |          |
|--------------|----------|----------|----------|
| <i>T</i> / K | $\chi_0$ | $\chi_1$ | $\alpha$ |
| 4.3          | 0.002    | 1.657    | 0.213    |
| 4.6          | 0.002    | 0.249    | 0.150    |
| 4.9          | 0.002    | 0.168    | 0.110    |
| 5.2          | 0.002    | 0.141    | 0.085    |
| 5.5          | 0.002    | 0.129    | 0.069    |
| 5.8          | 0.002    | 0.122    | 0.069    |
| 6.1          | 0.002    | 0.115    | 0.059    |
| 6.4          | 0.002    | 0.109    | 0.066    |
| 6.7          | 0.0019   | 0.1049   | 0.0654   |
| 7            | 0.00187  | 0.10052  | 0.0723   |
| 7.3          | 0.00191  | 0.09604  | 0.0642   |
| 7.6          | 0.00135  | 0.09246  | 0.0721   |
| 7.9          | 0.00189  | 0.08881  | 0.0652   |
| 8.2          | 0.00136  | 0.08558  | 0.0731   |
| 8.5          | 0.00158  | 0.08251  | 0.0731   |
| 8.8          | 4.63E-4  | 0.0798   | 0.0831   |
| 9.1          | 9.28E-4  | 0.0773   | 0.0842   |
| 9.4          | 0.0023   | 0.0747   | 0.0804   |
| 9.7          | 0.00485  | 0.0722   | 0.0444   |
| 10.0         | 0.00459  | 0.0700   | 0.0429   |
| 10.4         | 0.0077   | 0.0674   | 0.0385   |
| 10.8         | 0.00675  | 0.06518  | 0.06209  |
| 11.2         | 0.01031  | 0.06281  | 0.03329  |
| 11.6         | 0        | 0.06108  | 0.15572  |
| 12.0         | 0.00211  | 0.05879  | 0.07434  |
